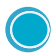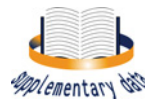

## OPEN ACCESS

# Biochemical evidence that regulation of Ero1 $\beta$ activity in human cells does not involve the isoform-specific cysteine 262

Henning G. HANSEN\*<sup>1</sup>, Cecilie L. SØLTOFT\*, Jonas D. SCHMIDT\*<sup>2</sup>, Julia BIRK†, Christian APPENZELLER-HERZOG\*† and Lars ELLGAARD\*<sup>3</sup>

\*Department of Biology, University of Copenhagen, 2200 Copenhagen, Denmark

†Department of Pharmaceutical Sciences, University of Basel, 4056 Basel, Switzerland

## Synopsis

In the ER (endoplasmic reticulum) of human cells, disulfide bonds are predominantly generated by the two isoforms of Ero1 (ER oxidoreductin-1): Ero1 $\alpha$  and Ero1 $\beta$ . The activity of Ero1 $\alpha$  is tightly regulated through the formation of intramolecular disulfide bonds to help ensure balanced ER redox conditions. Ero1 $\beta$  is less tightly regulated, but the molecular details underlying control of activity are not as well characterized as for Ero1 $\alpha$ . Ero1 $\beta$  contains an additional cysteine residue (Cys<sup>262</sup>), which has been suggested to engage in an isoform-specific regulatory disulfide bond with Cys<sup>100</sup>. However, we show that the two regulatory disulfide bonds in Ero1 $\alpha$  are likely conserved in Ero1 $\beta$  (Cys<sup>90</sup>–Cys<sup>130</sup> and Cys<sup>95</sup>–Cys<sup>100</sup>). Molecular modelling of the Ero1 $\beta$  structure predicted that the side chain of Cys<sup>262</sup> is completely buried. Indeed, we found this cysteine to be reduced and partially protected from alkylation in the ER of living cells. Furthermore, mutation of Cys<sup>100</sup> – but not of Cys<sup>262</sup> – rendered Ero1 $\beta$  hyperactive in cells, as did mutation of Cys<sup>130</sup>. Ero1 $\beta$  hyperactivity induced the UPR (unfolded protein response) and resulted in oxidative perturbation of the ER redox state. We propose that features other than a distinct pattern of regulatory disulfide bonds determine the loose redox regulation of Ero1 $\beta$  relative to Ero1 $\alpha$ .

**Key words:** disulfide-bond formation, endoplasmic reticulum oxidoreductin-1 (Ero1), redox regulation, unfolded protein response (UPR)

Cite this article as: Hansen, H.G., Søltoft, C.L., Schmidt, J.D., Birk, J., Appenzeller-Herzog, C. and Ellgaard, L. (2014) Biochemical evidence that regulation of Ero1 $\beta$  activity in human cells does not involve the isoform-specific cysteine 262. *Biosci. Rep.* **34**(2), art:e00103.doi:10.1042/BSR20130124

## INTRODUCTION

In the ER (endoplasmic reticulum), optimal redox conditions are maintained to facilitate formation of native disulfide bonds in secretory proteins. In mammalian cells, disulfide bonds are mainly generated by Ero1 (ER oxidoreductin-1) [1,2]. Proteins of the Ero1 family comprise two conserved di-cysteine active sites [3] (Figure 1). The so-called inner active site sits adjacent to a FAD moiety inside a four-helix bundle, whereas the outer active site (containing the two ‘shuttle’ cysteines) is located on a flexible loop region [4,5]. The inner active site is oxidized by molecular oxygen via FAD, which leads to generation of

hydrogen peroxide [6–8]. In turn, the inner active site oxidizes the shuttle cysteines by thiol–disulfide exchange [9]. The shuttle cysteines then oxidize active-site cysteines in members of the PDI (protein disulfide-isomerase) family [2, 8, 10–12]. As the final step in the Ero1–PDI disulfide relay, PDIs introduce disulfide bonds into newly synthesized proteins in the ER [13].

Two isoforms of Ero1 have been identified in nearly all vertebrates studied so far [14] including humans: Ero1 $\alpha$  and Ero1 $\beta$  [15,16]. Whereas Ero1 $\alpha$  is widely expressed, Ero1 $\beta$  is predominantly found in select tissues, such as the pancreas and salivary gland [16,17]. Both Ero1 isoforms are up-regulated by the UPR (unfolded protein response), which is a transcriptional and translational programme that is induced by accumulation of

**Abbreviations:** AMS, 4-acetamido-4'-maleimidylstilbene-2,2'-disulfonic acid; ATF6 $\alpha$ , activating transcription factor 6 $\alpha$ ; BiP, immunoglobulin heavy-chain-binding protein; DTT, dithiothreitol; Dox, doxycycline; ER, endoplasmic reticulum; Ero1, endoplasmic reticulum oxidoreductin-1; Ero1 $\alpha$ -WT, wild-type Ero1 $\alpha$ ; HEK-293 cells, human embryonic kidney cells; HERP, homocysteine-induced endoplasmic reticulum (ER) protein; NEM, *N*-ethylmaleimide; PDI, protein disulfide-isomerase; PERK, PKR (double-stranded-RNA-dependent protein kinase)-like endoplasmic reticulum kinase; TCA, trichloroacetic acid; UPR, unfolded protein response.

<sup>1</sup> Present address: Novo Nordisk Foundation Center for Biosustainability, Technical University of Denmark, 2970 Hørsholm, Denmark.

<sup>2</sup> Present address: Department of International Health, Immunology and Microbiology, University of Copenhagen, 2200 Copenhagen, Denmark.

<sup>3</sup> To whom correspondence should be addressed (email: lellgaard@bio.ku.dk).

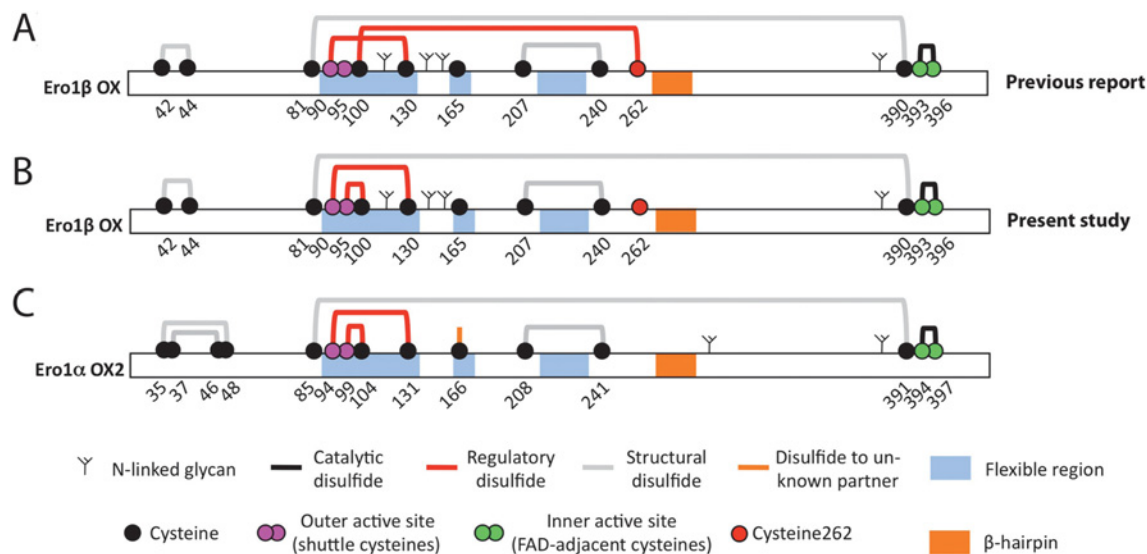

**Figure 1** Disulfide bonds in *Ero1β* and *Ero1α*

**(A)** Schematic representation of the proposed disulfide pattern in the OX redox form of *Ero1β* as reported by Wang et al. [7]. **(B)** Proposed disulfide bond pattern in *Ero1β* based on the present study. **(C)** Disulfide bond pattern in *Ero1α* OX2 verified by mass spectrometry [23,24] and crystallography [4]. The cysteine residues are shown in black, magenta (outer active site), green (inner active site) and red (Cys<sup>262</sup> in *Ero1β*) with amino acid numbering. Disulfide bonds are depicted as thick grey (likely structural), black (active site) or red (reported regulatory function; *Ero1β* [7,32] and this study, *Ero1α* [4,23,24,47]) lines. The thick orange line at Cys<sup>166</sup> indicates the connection to a potential (but unidentified) disulfide partner. The flexible regions are coloured in light blue and fork-like branches depict predicted high-mannose N-linked glycans. The β-hairpin region shown to interact with PDI is coloured orange.

misfolded proteins in the ER (designated ER stress). The UPR seeks to restore ER homeostasis, for example by decreasing the ER protein load through translational arrest and in parallel up-regulating chaperones to assist folding [18]. PERK [PKR (double-stranded-RNA-dependent protein kinase)-like endoplasmic reticulum kinase], Inositol-requiring enzyme 1α (Ire1α) and ATF6α (activating transcription factor 6α) are the three transmembrane transducers that initiate ER-to-nucleus signalling upon ER stress. Whereas the PERK pathway is involved in up-regulating *Ero1α* [19], *Ero1β* is induced by the XBP1s transcription factor (which is activated by Ire1α) [20] and ATF6α [21].

Apart from the first three cysteines in *Ero1α* (Cys<sup>35</sup>, Cys<sup>37</sup> and Cys<sup>46</sup>), the 12 additional cysteines are conserved in the vertebrate branch of the *Ero1* family [22,23]. In addition to these 12 cysteines, human *Ero1β* contains a cysteine residue in position 262 (Cys<sup>262</sup>) (Figure 1). The disulfide pattern in *Ero1α* has been mapped by mass spectrometry [23,24] and crystallography [4] (Figure 1). In contrast to *Ero1* from *Saccharomyces cerevisiae* (*Ero1p*) [5], the *Ero1α* shuttle cysteines (Cys<sup>94</sup> and Cys<sup>99</sup>) can engage in regulatory disulfide bonds with non-active-site cysteines (Cys<sup>131</sup> and Cys<sup>104</sup>, respectively) [23,25]. The presence of these two disulfide bonds blocks the outer active site and thus inhibits the activity of *Ero1α* [23,25]. In the cell, formation and reduction of these inhibitory disulfide bonds depend on the redox state of PDI [23]. This gives rise to a tightly regulated homeostatic feedback mechanism where *Ero1α* is only active when oxidized PDI is scarce [23]. Since the ER glutathione redox buffer influences the redox state of PDI [26,27], *Ero1α* activity is modulated by the

ratio between oxidized and reduced glutathione mediated through PDI [28]. Similarly, redox regulation of *Ero1p* in *S. cerevisiae* is also influenced by the redox state of PDI and glutathione [29–31]. Moreover, the ratio between oxidized and reduced glutathione is tightly balanced in the ER in human cells, which is at least in part a consequence of the *Ero1* feedback regulation [2].

In comparison with *Ero1α*, *Ero1β* activity does not seem to be as tightly regulated. Whereas overexpressed *Ero1α*-WT (wild-type *Ero1α*) is predominantly inactive and therefore has a subtle effect on the redox state of the PDI homologue ERp57 [23,24], overexpression of *Ero1β*-WT hyperoxidizes ERp57, i.e. leads to a larger fraction of the molecules with active-site cysteines in the disulfide-bonded state [23,32]. Similarly, *Ero1β*-WT is more active than *Ero1α*-WT in an *in vitro* oxidation assay performed with PDI as the substrate [7]. On non-reducing SDS-PAGE gels exogenous *Ero1β* expressed in mammalian cells migrates as two distinct redox species, with the distribution between the faster migrating (OX) and slower migrating species (Red) varying between experiments [23,33,34]. Similar to *Ero1α* [25], an initial shift from the OX to the Red species of *Ero1β* was observed during the catalysis of thioredoxin oxidation *in vitro* [7]. When thioredoxin was completely oxidized, the redox state of *Ero1β* reverted to the OX species [7]. Thus, *Ero1β* activity is also regulated by intramolecular disulfides.

In *Ero1α*, a cysteine-to-alanine mutant of Cys<sup>104</sup> and Cys<sup>131</sup> (*Ero1α*-C104A/C131A) displays hyperactivity since it can no longer form the two regulatory disulfides, but retains the two residues of the outer active site, Cys<sup>94</sup> and Cys<sup>99</sup> [24,25].

Recently, we showed that overexpression in human cells of the equivalent Ero1 $\beta$  mutant (Ero1 $\beta$ -C100A/C130A) gave rise to more pronounced hyperoxidation of ERp57 relative to overexpression of Ero1 $\beta$ -WT [32], suggesting that the regulatory mechanism is shared for Ero1 $\alpha$  and Ero1 $\beta$ . However, Ero1 $\beta$  contains an additional cysteine residue (Cys<sup>262</sup>), which is not present in Ero1 $\alpha$ . A disulfide bond between Cys<sup>100</sup> and Cys<sup>262</sup> was recently proposed to be present in Ero1 $\beta$  purified from *Escherichia coli* [7]. Moreover, Ero1 $\beta$ -C100A displayed slowed oxidation kinetics relative to Ero1 $\beta$ -WT [7], suggesting that the presence of the proposed Cys<sup>100</sup>-Cys<sup>262</sup> disulfide bond increases Ero1 $\beta$  activity. On this background, we decided to further investigate the interplay between intramolecular disulfide bonds and regulation of activity in Ero1 $\beta$ .

## MATERIALS AND METHODS

### Primers and plasmids

Human Ero1 $\beta$ -myc6his ([16]; a gift from R. Sitia, Milan) cloned into the pcDNA5/FRT/TO vector [23] was used as a template for QuikChange mutagenesis (Stratagene) to introduce Cys-to-Ala mutations. The following primer was used to generate the C262A mutation (only the sense strand is shown): C262A 5'-GACTTCATGCTAGCATCAATTTACATCTAGCCGCAAATTATCTTTTGG-3'. The C100A and C130A mutations have been described before [32]. All plasmids were sequenced to confirm the correct DNA sequence of the inserts.

### Cell culture

Dox (doxycycline)-inducible Flp-In T-REx HEK-293 (Life Technologies) cell lines were generated and grown as previously described [23]. Ero1 $\beta$  expression was induced for 24 h (unless otherwise stated) using 1  $\mu$ g/ml Dox (Sigma). For ER stress induction, cells were treated with either 5  $\mu$ M thapsigargin (Sigma) or 2.5  $\mu$ g/ml tunicamycin (Sigma) for the indicated time.

### Sample preparation and AMS (4-acetamido-4'-maleimidylstilbene-2,2'-disulfonic acid) modification

Cells were treated with NEM (*N*-ethylmaleimide) and subsequently lysed as described elsewhere [35]. The AMS (Life Technologies) modification protocol has been described previously [35]. Reduced and oxidized control lysates were obtained from cells treated with 10 mM DTT (dithiothreitol) or 5 mM diamide (both Sigma) for 5 min at 37°C in full growth medium.

### Antibodies and Western blotting

The following mouse monoclonal antibodies were used:  $\alpha$ His (Tetra-His, Qiagen),  $\alpha$ myc (9E10, Covance),  $\alpha\beta$ -actin (AC-15, Sigma). The rabbit polyclonal antisera used were:  $\alpha$ BiP (G8918,

Sigma),  $\alpha$ ERp57 (a gift from A. Helenius, Zürich, Switzerland),  $\alpha$ HERP (a gift from L. Hendershot, Memphis, TN, U.S.A.). Western blotting was performed as previously described [24]. The shown Western blots are representative of at least two independent experiments.

### Redox state analysis of Ero1 $\beta$ by TCA (trichloroacetic acid) precipitation and alkylation of free thiols

Cells cultivated to 60–80% confluency in 6 cm dishes were washed twice in PBS. They were then concomitantly lysed and precipitated by incubation in 10% (v/v) TCA for 15 min on ice. Cells were transferred to an Eppendorf tube, centrifuged (16 100 g, 4°C, 15 min) and the supernatant was discarded. Pellets were washed once in ice-cold acetone, centrifuged (16 100 g, 4°C, 15 min) and resuspended in 100  $\mu$ l 100 mM Tris-HCl pH 7.0, 8% (v/v) glycerol, 2% (w/v) SDS, 10% dimethyl sulfoxide, 0.01% (w/v) bromocresol purple and 20 mM NEM. Samples were neutralized by drop-wise addition of 1 M Tris-HCl, pH 7.5, 2% SDS until samples turned purple (bromocresol purple changes colour between pH 5.2 and 6.8). The pellets were subsequently dissolved by sonication, incubated at RT in the dark for 1 h and the redox state of Ero1 $\beta$  was determined by non-reducing Western blotting.

## RESULTS

### Structure homology modelling of Ero1 $\beta$ predicts Cys<sup>262</sup> to be buried in the structure

The amino acid sequences of Ero1 $\beta$  are highly conserved between orthologues (Supplementary Figure S1 available at <http://www.bioscirep.org/bsr/034/bsr034e103add.htm>). Thus, potential roles of cysteine residues in regulatory disulfide bonds based on evolutionary conservation could not be inferred from a multiple sequence alignment. Instead, we used structure homology modelling of Ero1 $\beta$  to assess the proposed disulfide patterns in the protein (Figures 1A and 1B). The protein structure prediction software SWISS-MODEL [36] was used to predict the three-dimensional structure of Ero1 $\beta$  based on the crystal structure of inactive Ero1 $\alpha$ , a mutant in essence corresponding to the OX2 form ([4]; PDB ID: 3AHR) (Figure 2A). The sequences of mature Ero1 $\alpha$  and Ero1 $\beta$  are highly similar [14] with a sequence identity of 65%. As expected from the high sequence conservation, the  $\alpha$ -helical fold in Ero1 $\alpha$  was predicted to be preserved in Ero1 $\beta$  including the four-helix bundle involved in FAD binding (Figure 2A, red-coloured  $\alpha$ -helices). The structure of the flexible region (residues 86–130) comprising the proposed Cys<sup>90</sup>-Cys<sup>130</sup> or the Cys<sup>95</sup>-Cys<sup>100</sup> disulfide bonds could not be reliably modelled (Figure 2A).

In contrast to the cysteines in the flexible region, Cys<sup>262</sup> is located at the end of a conserved helix [14], which is part of the four-helix bundle (Figure 2A). Moreover, Cys<sup>262</sup> is positioned close

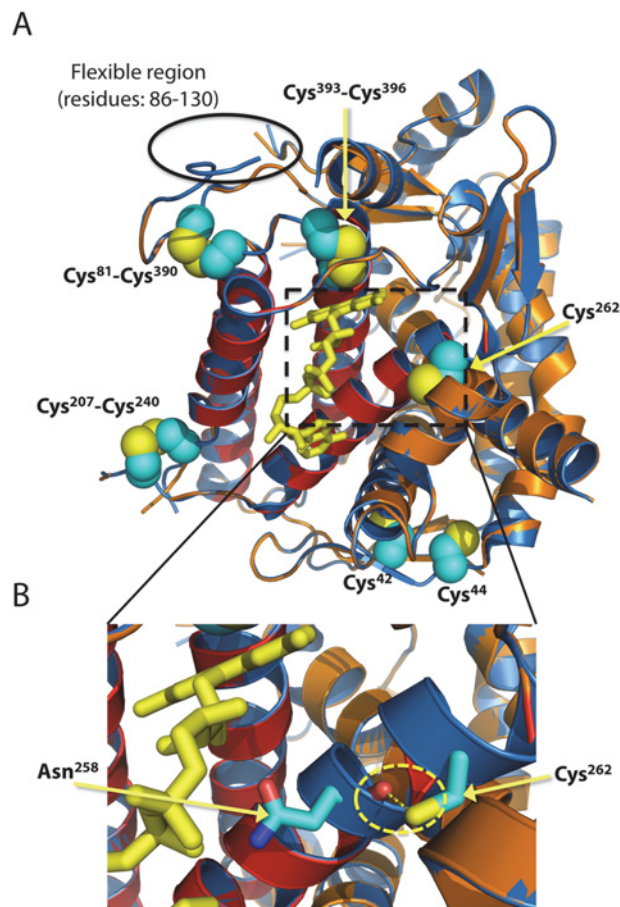

**Figure 2 Structural model of Ero1 $\beta$**

(A) Superimposition of the structure of inactive Ero1 $\alpha$  (PDB ID: 3ahr; [4]) and a structural model of Ero1 $\beta$ . The latter was homology modelled based on the structure of inactive Ero1 $\alpha$  using the SWISS-MODEL software [36]. Predicted flexible regions (see Figure 1) are not depicted. The approximate position of the flexible region comprising residues 86–130 in Ero1 $\beta$  is indicated. In Ero1 $\beta$ , the  $\alpha$ -helices of the four-helix bundle are shown in red, the remainder of the molecule in orange and the cysteine residue side chains are depicted as spheres (yellow: sulfur, cyan: carbon) with amino acid numbering indicated. Ero1 $\alpha$  is depicted in blue and the FAD moiety (stick model) in yellow. (B) Zoom of the structural overlay in (A). The predicted hydrogen bond (encircled) between the Ero1 $\beta$  Cys<sup>262</sup> SH-group and the carbonyl O (red) of Asn<sup>258</sup> is shown by the broken yellow line. In the model, the distance between the S and O atoms is 2.74 Å. This figure was created in PyMOL (<http://www.pymol.org>).

to a protruding  $\beta$ -hairpin, which is critical for the interaction with PDI [37]. The equivalent residue in Ero1 $\alpha$  (Ser<sup>263</sup>) is completely buried. Similarly, in the Ero1 $\beta$  model, Cys<sup>262</sup> is predicted to have a relative accessible surface area of 0 (as calculated by the ASAView software [38] and the GETAREA method [39]), which strongly suggests that Cys<sup>262</sup> in Ero1 $\beta$  is buried in the native structure. Moreover, the side chain –SH (Cys<sup>262</sup>)/–OH (Ser<sup>263</sup>) is predicted to form a hydrogen bond with the backbone carbonyl group of Asn<sup>258</sup>/Asn<sup>259</sup>, respectively (Figure 2B). This hydrogen bond seems to be part of a conserved hydrogen bond network, including hydrogen bonds from the side chain of Asn<sup>258</sup>/Asn<sup>259</sup>

to FAD, which helps stabilize the structure in the vicinity of the bound cofactor. Finally, we also note that in *Xenopus tropicalis* Ero1 $\beta$ , a serine residue is found in place of Cys<sup>262</sup> (Supplementary Figure S1), indicating that a cysteine is not strictly necessary at this position as may have been expected if it played an important function in regulating the activity of the enzyme.

### SDS-PAGE mobility of Ero1 $\beta$ mutants suggests conservation of regulatory disulfide bonds in Ero1 $\alpha$ and Ero1 $\beta$

To investigate the structural importance of intramolecular disulfide bonds in human Ero1 $\beta$ , we expressed Ero1 $\beta$  cysteine mutants in human cells and analysed the mobility of these mutants by non-reducing SDS-PAGE. Apart from already established stable cell lines for ectopic inducible expression of Ero1 $\beta$ -WT [23] and Ero1 $\beta$ -C100A/C130A [32], we generated three new inducible cell lines for the following mutants: Ero1 $\beta$ -C100A, Ero1 $\beta$ -C130A and Ero1 $\beta$ -C262A. As compared with Ero1 $\beta$ -WT, Ero1 $\beta$ -C100A and Ero1 $\beta$ -C262A showed similar expression levels, whereas the expression levels of Ero1 $\beta$ -C130A and Ero1 $\beta$ -C100/130A were lower (Figure 3A). Importantly, none of the cell lines overexpressing Ero1 $\beta$  mutants of Cys<sup>100</sup> and/or Cys<sup>130</sup>, which turned out to be hyperactive (see below), expressed more protein than the Ero1 $\beta$ -WT-expressing cell line.

As previously observed [33], the monomeric form of exogenous Ero1 $\beta$ -WT migrated as two distinct redox species (Red and OX) when cells were treated with NEM to alkylate free thiols *in situ* prior to lysis (Figure 3B, lane 2 and Figure 3C, lane 3). However, upon TCA precipitation with subsequent NEM treatment, monomeric Ero1 $\beta$ -WT migrated as one redox species (Figure 3D, lane 4). TCA precipitation rapidly quenches thiol–disulfide exchange reactions and denatures proteins, enabling alkylation of thiols buried in the native structure [40]. When cells are *in situ* NEM-treated, approximately 20% of the cellular protein thiols have been shown to be inaccessible to NEM [41]. Such NEM inaccessibility is thought to be a consequence of these thiols being buried in the native structure [40]. We therefore suggest that inefficient alkylation of (a) free thiol(s) buried in the structure of Ero1 $\beta$  gives rise to rearrangement of disulfide bonds upon denaturation, leading to the appearance of the Red Ero1 $\beta$  redox form (Figures 3B and 3C). Conversely, when all free thiols are efficiently alkylated, Ero1 $\beta$ -WT is preserved as a single redox species visible on SDS-PAGE gels (Figure 3D).

The SDS-PAGE mobility of the Ero1 $\beta$  variants on non-reducing gels (Figure 3D) is consistent with Ero1 $\beta$  having a similar pattern of disulfide bonds as Ero1 $\alpha$  (Figures 1B and 1C). We were able to detect a relatively small migration shift between Ero1 $\beta$ -WT and Ero1 $\beta$ -C100A (Figure 3D, lanes 4–5) suggesting that Cys<sup>100</sup> is not engaged in a long-range disulfide bond. In contrast, a larger shift was observed upon mutation of Cys<sup>130</sup> (Figure 3D, lanes 6–7) consistent with removal of the longer-ranging Cys<sup>90</sup>–Cys<sup>130</sup> disulfide bond. No redox species of Ero1 $\beta$ -C100A co-migrated with Ero1 $\beta$ -C130A (Figure 3D, lanes 5–6), suggesting that the Cys<sup>90</sup>–Cys<sup>130</sup> disulfide bond is intact in Ero1 $\beta$ -C100A.

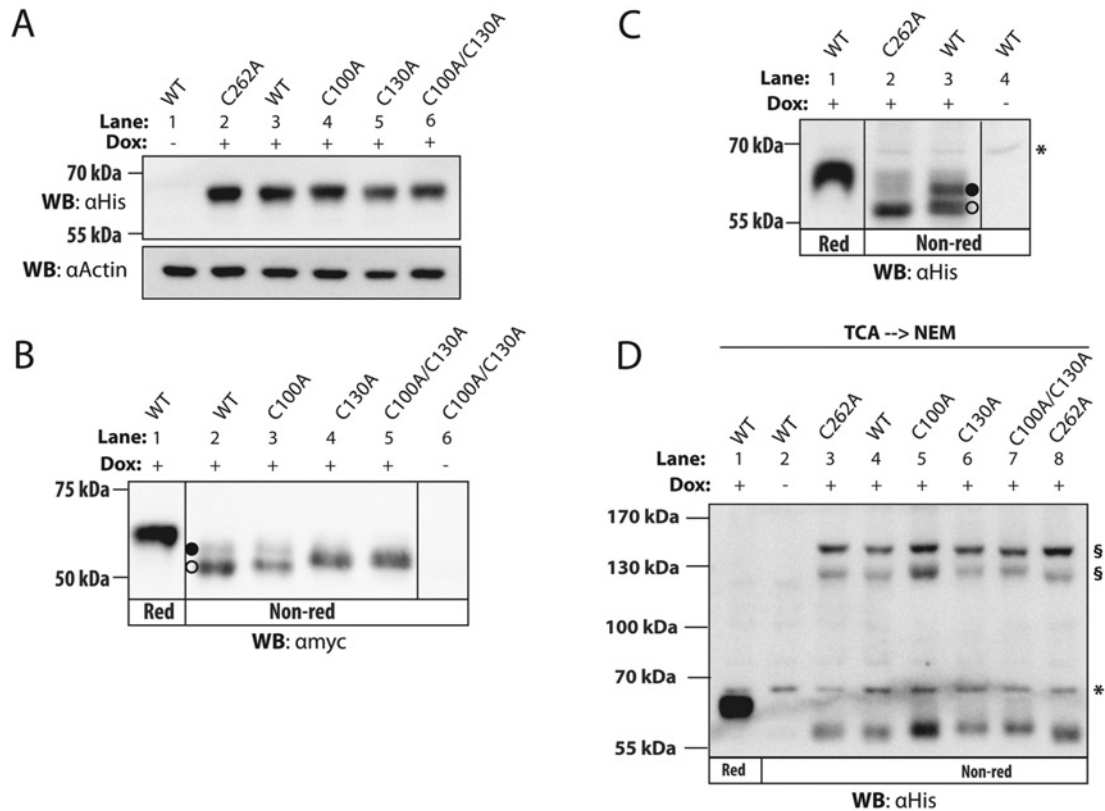

**Figure 3** SDS-PAGE mobility of Ero1 $\beta$  variants suggests that Ero1 $\alpha$  and Ero1 $\beta$  share their sets of regulatory disulfide bonds

(A) Expression of His- and Myc-tagged Ero1 $\beta$  variants was induced with Dox for 24 h and cells were NEM treated to alkylate free thiols. Equal amounts of protein from lysates were analysed by reducing SDS-PAGE and Western blotting using  $\alpha$ His (Ero1 $\beta$ ) and  $\alpha$ Actin (loading control) to compare expression levels of Ero1 $\beta$  variants. (B,C) Cell lysates were obtained as in (A). The SDS-PAGE mobility of the Ero1 $\beta$  variants was analysed under non-reducing (Non-red) or reducing (Red) conditions by  $\alpha$ myc or  $\alpha$ His Western blotting. The open and filled circles indicate the previously described OX and Red redox forms of Ero1 $\beta$  WT [33], respectively, and vertical hairlines denote removal of lanes. Asterisk denotes a background band. (D) Expression of Ero1 $\beta$  variants was induced as in (A). Cells were subjected to TCA precipitation to rapidly quench thiol-disulfide exchange reactions and to denature cellular proteins. Precipitates were redissolved in a buffer containing NEM to alkylate free thiols. Subsequently, the SDS-PAGE mobility of the Ero1 $\beta$  variants was analysed under non-reducing conditions by  $\alpha$ His Western blotting. Section signs (§) indicate possible Ero1 $\beta$  mixed-disulfide dimeric species and the asterisk (\*) denotes a background band.

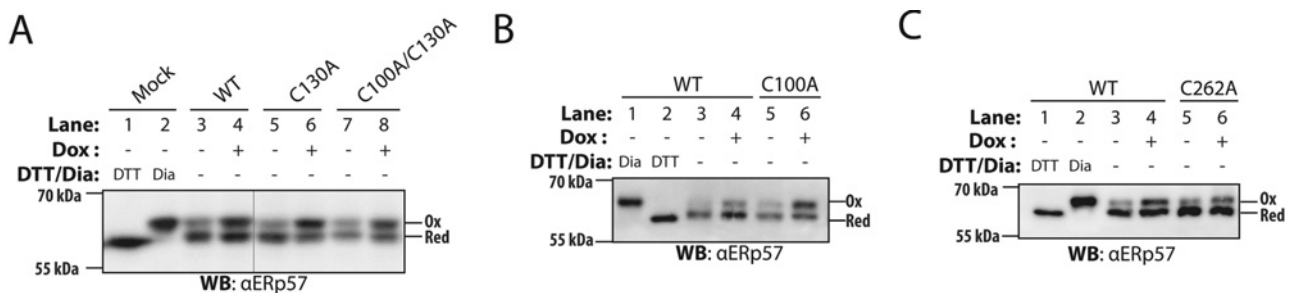

**Figure 4** Hyperoxidation of ERp57 is intensified by removal of regulatory disulfide bonds in Ero1 $\beta$

(A-C) Where indicated, expression of Ero1 $\beta$  variants was induced with Dox for 24 h. Prior to lysis, cells were treated with NEM to alkylate free thiols. After cell lysis, cysteines present in disulfides were reduced and decorated with AMS. Such AMS modification of active-site cysteines originally present in the oxidized state gives rise to slower SDS-PAGE mobility compared with the (NEM-decorated) pool of ERp57 containing reduced active-site cysteines. The cellular redox state of ERp57 was visualized by Western blotting. DTT and Diamide (Dia) treated-cells were used to show the mobility of fully oxidized (Ox) and reduced (Red) ERp57. A vertical hairline denotes removal of lanes.

A fraction of Ero1 $\beta$  is present as a disulfide-bonded homodimer in human cells [33] and when expressed in bacteria [7]. Moreover, Ero1 $\beta$  engages in heterodimeric mixed-disulfide species with PDI and ERp44 in human cells [42]. The possible dimeric species involving Ero1 $\beta$ -WT and Ero1 $\beta$ -C262A were similar (Figure 3D, lanes 3–4), suggesting that Cys<sup>262</sup> is not involved in formation of mixed-disulfide dimeric species. Notably, Ero1 $\beta$ -C262A did not migrate slower than Ero1 $\beta$ -WT (Figure 3D, lanes 3–4), suggesting that Cys<sup>262</sup> is not engaged in a long-range disulfide bond. Instead, Ero1 $\beta$ -C262A was present exclusively as the OX redox species in lysates from cells treated *in situ* with NEM (Figure 3C, lane 2), and as a single redox species co-migrating with Ero1 $\beta$ -WT in lysates from cells subjected to TCA precipitation (Figure 3D, lane 3). This clearly suggests that non-native *ex vivo* disulfide shuffling in lysates of *in situ* NEM-treated cells observed for Ero1 $\beta$ -WT (Figures 3B and 3C) depends on the presence of Cys<sup>262</sup>, and that this residue is inaccessible to NEM in the native structure.

Based on these results, we propose that the regulatory disulfide bonds in Ero1 $\alpha$  (Cys<sup>94</sup>-Cys<sup>131</sup> and Cys<sup>99</sup>-Cys<sup>104</sup>) are conserved in Ero1 $\beta$  (Cys<sup>90</sup>-Cys<sup>130</sup> and Cys<sup>95</sup>-Cys<sup>100</sup>) and that Cys<sup>262</sup> constitutes a poorly accessible free thiol in the native structure. The deduced disulfide pattern in the OX redox form of Ero1 $\beta$  is shown in Figure 1(B).

### Removal of either of the regulatory disulfide bonds increases the activity of Ero1 $\beta$ in cells

We next wanted to assess the relative contribution of the proposed disulfide bonds (Cys<sup>90</sup>-Cys<sup>130</sup> and Cys<sup>95</sup>-Cys<sup>100</sup>) to the regulation of Ero1 $\beta$  activity. First, we analysed the cellular redox state of ERp57, as assessed by differential alkylation of the active-site cysteines. This assay probes the ratio of ERp57 molecules with active-site cysteines in the oxidized and reduced state, respectively, and has been used routinely in the field as readout for changes in the ER redox environment [23,27,43]. Mutation of Cys<sup>100</sup> and Cys<sup>130</sup> alone or in combination increased the hyperoxidizing effect of Ero1 $\beta$  on the redox state of ERp57 relative to Ero1 $\beta$ -WT (Figures 4A and 4B). This suggests that both disulfide bonds (Cys<sup>90</sup>-Cys<sup>130</sup> and Cys<sup>95</sup>-Cys<sup>100</sup>) are involved in inhibiting the activity of Ero1 $\beta$ . Consistent with Cys<sup>262</sup> not being involved in regulation of Ero1 $\beta$  activity, overexpression of Ero1 $\beta$ -C262A showed only a minor hyperoxidizing effect on ERp57 (Figure 4C). It should be noted that consistent with our previous studies, and as noted before [2], the ERp57 redox state differed between individual experiments likely reflecting physiological variations. This, however, does not affect the overall conclusions concerning the relative oxidizing effects of overexpressing different Ero1 $\beta$  variants.

We recently showed that a deregulated Ero1 $\alpha$  mutant (Ero1 $\alpha$ -C104A/C131A) markedly activated the UPR as a result of its increased oxidase activity when overexpressed in HEK-293 cells (human embryonic kidney cells) [24]. To study whether overexpression of Ero1 $\beta$  also induces the UPR, we analysed the protein levels of the two established UPR targets, BiP (immunoglobulin heavy-chain-binding protein) and HERP (homocysteine-induced

ER protein) [44]. As expected from the loose regulation of Ero1 $\beta$  (Figure 4), BiP and HERP levels were moderately increased upon expression of Ero1 $\beta$ -WT (Figures 5A–5D). These effects were more pronounced upon mutation of Cys<sup>100</sup> and Cys<sup>130</sup> alone or in combination (Figures 5A–5C), correlating with the impact of these mutants on the redox state of ERp57 (Figures 4A and 4B). Overexpression of Ero1 $\beta$ -C262A showed a similar degree of UPR induction as Ero1 $\beta$ -WT (Figure 5D). These findings suggested that Cys<sup>262</sup> is not involved in regulating Ero1 $\beta$  activity, and is in keeping with our proposed disulfide pattern of Ero1 $\beta$  (Figure 1B).

## DISCUSSION

Tight regulation of Ero1 $\alpha$  activity is important to maintain balanced ER redox conditions [23–25]. We propose that the regulatory disulfide bonds in Ero1 $\alpha$  and Ero1 $\beta$  are conserved (Figures 1B and 1C). This conclusion is based on several lines of evidence, including molecular modelling of the Ero1 $\beta$  structure (Figure 2), SDS-PAGE mobility analysis of Ero1 $\beta$  mutants (Figures 3B–3D) and ER redox (Figure 4) and ER stress readouts (Figure 5). Overall, the findings that overexpression of Ero1 $\beta$  mutants devoid of Cys<sup>100</sup> and/or Cys<sup>130</sup> induces the UPR, hyperoxidizes ERp57 and that Ero1 $\beta$ -C100A/C130A hyperoxidizes an ER-localized glutathione sensor [32], indicate that the underlying mechanism is likely to involve an oxidizing perturbation of the ER redox environment, which in turn results in protein misfolding and therefore activation of the UPR.

In a previous study [7], Ero1 $\beta$ -C262A purified from *E. coli* displayed a prominent slow-migrating redox species when compared with Ero1 $\beta$ -WT by non-reducing SDS-PAGE, indicating the loss of a long-range disulfide. Furthermore, analysis of tryptic fragments supported the presence of a Cys<sup>100</sup>-Cys<sup>262</sup> disulfide bond. Finally, the Ero1 $\beta$ -C100A mutant was less active *in vitro* than Ero1 $\beta$ -WT, suggesting that the presence of the proposed Cys<sup>100</sup>-Cys<sup>262</sup> disulfide bond positively regulates the activity of Ero1 $\beta$ .

Here, we expressed Ero1 $\beta$  (and mutants thereof) in its native environment in the ER of human cells and reached the conclusion that a disulfide bond between Cys<sup>100</sup> and Cys<sup>262</sup> is not likely to form. Thus, mutation of Cys<sup>100</sup> rendered Ero1 $\beta$  hyperactive and overexpression of Ero1 $\beta$ -C262A showed effects comparable to Ero1 $\beta$ -WT overexpression. We also provide two-fold evidence that Cys<sup>262</sup> is a solvent inaccessible residue in the native structure of Ero1 $\beta$ . First, a fraction of Ero1 $\beta$ -WT molecules rearrange into a redox species that migrates as the Red form upon *in situ* NEM treatment in a Cys<sup>262</sup>-dependent manner, suggesting that NEM cannot gain access to Cys<sup>262</sup> under native conditions. Secondly, a homology model of Ero1 $\beta$  based on the crystal structure of Ero1 $\alpha$  places Cys<sup>262</sup> in a non-solvent exposed site in a highly conserved  $\alpha$ -helix. Collectively, these findings strongly support the conclusion that Cys<sup>262</sup> does not engage in an intramolecular disulfide bond with Cys<sup>100</sup>. To verify the proposed

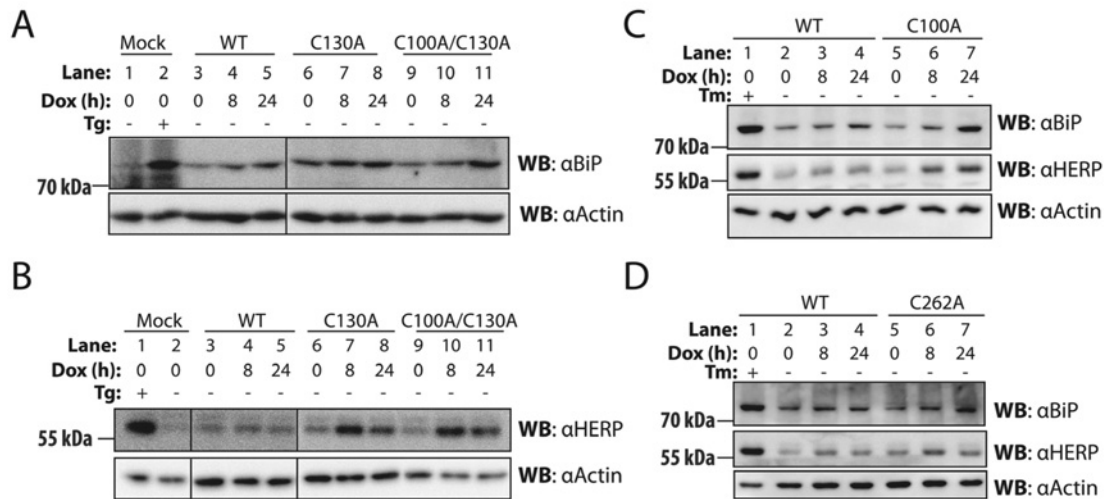

**Figure 5** Absence of regulatory disulfide bonds in Ero1 $\beta$  increases induction of the unfolded protein response (UPR) (A–D) Expression of Ero1 $\beta$  variants was induced with doxycycline (Dox) for the indicated periods of time. Expression levels of BiP and HERP were analysed by Western blotting using  $\alpha$ Actin as loading control. The mock cell line is stably transfected with an empty vector. Cells were either treated with 5  $\mu$ M thapsigargin (Tg) for 18 h (A) and 6 h (B) or treated with 2.5  $\mu$ g/ml tunicamycin (Tm) for 20 h (C, D) to generate positive control lysates for induction of the UPR.

disulfide pattern, we also sought to map the intramolecular disulfides in Ero1 $\beta$  purified from human cells by mass spectrometry, as has previously been achieved for Ero1 $\alpha$  [23]. Unfortunately, the results obtained by this approach were ambiguous (H. G. Hansen, L. Ellgaard and F. Hubálek, unpublished work), which was likely a result of disulfide bond scrambling in the course of sample preparation.

Using TCA precipitation and subsequent NEM treatment, we demonstrated that the Red form of Ero1 $\beta$  [33] is likely an artefact of inefficient thiol alkylation, indicating that overexpressed Ero1 $\beta$  is present solely as the OX redox species. Unfortunately, the redox state of endogenous Ero1 $\beta$  assessed by SDS–PAGE mobility under non-reducing conditions is currently unknown. Moreover, we currently do not know why Ero1 $\beta$  migrates 5–7 kDa faster than Ero1 $\alpha$  on non-reducing SDS–PAGE gels [23], even though the predicted molecular mass of mature Ero1 $\beta$  is only 1–2 kDa smaller than the corresponding mass of mature Ero1 $\alpha$ . Since deglycosylation of Ero1 $\beta$  gives rise to a more pronounced mobility shift on SDS–PAGE gels as compared with Ero1 $\alpha$  [16], the presence of N-linked glycans cannot explain the unexpectedly large difference in SDS–PAGE mobility between Ero1 $\alpha$  and Ero1 $\beta$ .

As Ero1 $\alpha$  and Ero1 $\beta$  likely share their sets of regulatory disulfide bonds, features other than a distinct pattern of disulfide bonds must determine the loose redox regulation of Ero1 $\beta$  relative to Ero1 $\alpha$ . Mutation of the Cys<sup>394</sup>–Phe–Lys–Cys<sup>397</sup> inner active site sequence of Ero1 $\alpha$  to the Ero1 $\beta$  sequence (Cys<sup>393</sup>–Asp–Lys–Cys<sup>396</sup>) substantially increases the oxidase activity of Ero1 $\alpha$  [7]. This suggests that Asp<sup>394</sup> in Ero1 $\beta$  contributes to the apparently loose redox regulation of Ero1 $\beta$  relative to Ero1 $\alpha$ .

As previously proposed [22], the loose regulation of Ero1 $\beta$  activity relative to Ero1 $\alpha$  could be explained by a higher reduc-

tion potential of the regulatory disulfide bonds in Ero1 $\beta$ . The high expression of Ero1 $\beta$  in the pancreas and salivary gland indicates a specific role of the protein in secretory tissues. Accordingly, oxidative folding of pro-insulin is impeded in pancreatic islet cells derived from Ero1 $\beta$ -compromised mice, an effect that is not exacerbated by concomitantly compromising Ero1 $\alpha$  function [45]. However, increasing disulfide-bond formation by exogenous Ero1 $\alpha$  expression stimulates oxidative folding of pro-insulin [46]. These observations suggest that the loose regulation of Ero1 $\beta$  activity could have evolved to optimally support the high demand of disulfide bonds in secretory tissues.

#### AUTHOR CONTRIBUTION

Henning Hansen and Lars Ellgaard designed and supervised the experimental work. Henning Hansen, Cecilie Søtoft, Jonas Schmidt, Julia Birk and Christian Appenzeller-Herzog performed the experiments. Henning Hansen and Lars Ellgaard wrote the paper, and Christian Appenzeller-Herzog contributed to revision of the paper.

#### ACKNOWLEDGEMENTS

We thank K. L. Doherty for excellent technical assistance, G. Nielsen and F. Hubálek for kind technical help and guidance in our attempts to map the disulfide bonds in Ero1 $\beta$  by mass spectrometry and A. Helenius and L. Hendershot for sharing reagents.

#### FUNDING

This work was supported by the Lundbeck Foundation [grant number 2009-3653 (to L.E.)], H.G.H. was a recipient of a Ph.D. stipend from the Faculty of Science at the University of Copenhagen, and an EliteForsk Travel Stipend from the Danish Ministry of Science,

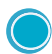

Innovation, and Higher Education [grant number 10-093459]. C.A.H. is an Ambizione grantee of the Swiss National Science Foundation [grant number 142964].

## REFERENCES

- Rutkevich, L. A. and Williams, D. B. (2012) Vitamin K epoxide reductase contributes to protein disulfide formation and redox homeostasis within the endoplasmic reticulum. *Mol. Biol. Cell* **23**, 2017–2027
- Appenzeller-Herzog, C., Riemer, J., Zito, E., Chin, K. T., Ron, D., Spiess, M. and Ellgaard, L. (2010) Disulphide production by Ero1alpha-PDI relay is rapid and effectively regulated. *EMBO J.* **29**, 3318–3329
- Bertoli, G., Simmen, T., Anelli, T., Molteni, S. N., Fesce, R. and Sitia, R. (2004) Two conserved cysteine triads in human Ero1alpha cooperate for efficient disulfide bond formation in the endoplasmic reticulum. *J. Biol. Chem.* **279**, 30047–30052
- Inaba, K., Masui, S., Iida, H., Vavassori, S., Sitia, R. and Suzuki, M. (2010) Crystal structures of human Ero1alpha reveal the mechanisms of regulated and targeted oxidation of PDI. *EMBO J.* **29**, 3330–3343
- Gross, E., Kastner, D. B., Kaiser, C. A. and Fass, D. (2004) Structure of Ero1p, source of disulfide bonds for oxidative protein folding in the cell. *Cell* **117**, 601–610
- Gross, E., Sevier, C. S., Heldman, N., Vitu, E., Bentzur, M., Kaiser, C. A., Thorpe, C. and Fass, D. (2006) Generating disulfides enzymatically: reaction products and electron acceptors of the endoplasmic reticulum thiol oxidase Ero1p. *Proc. Natl. Acad. Sci. U.S.A.* **103**, 299–304
- Wang, L., Zhu, L. and Wang, C. C. (2011) The endoplasmic reticulum sulfhydryl oxidase Ero1beta drives efficient oxidative protein folding with loose regulation. *Biochem. J.* **434**, 113–121
- Wang, L., Li, S. J., Sidhu, A., Zhu, L., Liang, Y., Freedman, R. B. and Wang, C. C. (2009) Reconstitution of human Ero1-Lalpha/protein-disulfide isomerase oxidative folding pathway *in vitro*. Position-dependent differences in role between the a and a' domains of protein-disulfide isomerase. *J. Biol. Chem.* **284**, 199–206
- Sevier, C. S. and Kaiser, C. A. (2006) Disulfide transfer between two conserved cysteine pairs imparts selectivity to protein oxidation by Ero1. *Mol. Biol. Cell.* **17**, 2256–2266
- Tu, B. P. and Weissman, J. S. (2002) The FAD- and O(2)-dependent reaction cycle of Ero1-mediated oxidative protein folding in the endoplasmic reticulum. *Mol. Cell* **10**, 983–994
- Frand, A. R. and Kaiser, C. A. (2000) Two pairs of conserved cysteines are required for the oxidative activity of Ero1p in protein disulfide bond formation in the endoplasmic reticulum. *Mol. Biol. Cell* **11**, 2833–2843
- Mezghrani, A., Fassio, A., Benham, A., Simmen, T., Braakman, I. and Sitia, R. (2001) Manipulation of oxidative protein folding and PDI redox state in mammalian cells. *EMBO J.* **20**, 6288–6296
- Appenzeller-Herzog, C. and Ellgaard, L. (2008) The human PDI family: versatility packed into a single fold. *Biochim. Biophys. Acta* **1783**, 535–548
- Araki, K. and Inaba, K. (2012) Structure, mechanism, and evolution of Ero1 family enzymes. *Antioxid. Redox Signal.* **16**, 790–799
- Cabibbo, A., Pagani, M., Fabbri, M., Rocchi, M., Farmery, M. R., Bulleid, N. J. and Sitia, R. (2000) ERO1-L, a human protein that favors disulfide bond formation in the endoplasmic reticulum. *J. Biol. Chem.* **275**, 4827–4833
- Pagani, M., Fabbri, M., Benedetti, C., Fassio, A., Pilati, S., Bulleid, N. J., Cabibbo, A. and Sitia, R. (2000) Endoplasmic reticulum oxidoreductin 1-beta (ERO1-Lbeta), a human gene induced in the course of the unfolded protein response. *J. Biol. Chem.* **275**, 23685–23692
- Ramming, T. and Appenzeller-Herzog, C. (2012) The physiological functions of mammalian endoplasmic oxidoreductin 1: on disulfides and more. *Antioxid. Redox Signal.* **16**, 1109–1118
- Walter, P. and Ron, D. (2011) The unfolded protein response: from stress pathway to homeostatic regulation. *Science* **334**, 1081–1086
- Marciniak, S. J., Yun, C. Y., Oyadomari, S., Novoa, I., Zhang, Y., Jungreis, R., Nagata, K., Harding, H. P. and Ron, D. (2004) CHOP induces death by promoting protein synthesis and oxidation in the stressed endoplasmic reticulum. *Genes Dev.* **18**, 3066–3077
- Shoulders, M. D., Ryno, L. M., Genereux, J. C., Moresco, J. J., Tu, P. G., Wu, C., Yates, J. R., 3rd, Su, A. I., Kelly, J. W. and Wiseman, R. L. (2013) Stress-independent activation of XBP1s and/or ATF6 reveals three functionally diverse ER proteostasis environments. *Cell Rep.* **3**, 1279–1292
- Adachi, Y., Yamamoto, K., Okada, T., Yoshida, H., Harada, A. and Mori, K. (2008) ATF6 is a transcription factor specializing in the regulation of quality control proteins in the endoplasmic reticulum. *Cell Struct. Funct.* **33**, 75–89
- Tavender, T. J. and Bulleid, N. J. (2010) Molecular mechanisms regulating oxidative activity of the Ero1 family in the endoplasmic reticulum. *Antioxid. Redox Signal.* **13**, 1177–1187
- Appenzeller-Herzog, C., Riemer, J., Christensen, B., Sørensen, E. S. and Ellgaard, L. (2008) A novel disulphide switch mechanism in Ero1alpha balances ER oxidation in human cells. *EMBO J.* **27**, 2977–2987
- Hansen, H. G., Schmidt, J. D., Søltoft, C. L., Ramming, T., Geertz-Hansen, H. M., Christensen, B., Sørensen, E. S., Juncker, A. S., Appenzeller-Herzog, C. and Ellgaard, L. (2012) Hyperactivity of the ero1alpha oxidase elicits endoplasmic reticulum stress but no broad antioxidant response. *J. Biol. Chem.* **287**, 39513–39523
- Baker, K. M., Chakravarthi, S., Langton, K. P., Sheppard, A. M., Lu, H. and Bulleid, N. J. (2008) Low reduction potential of Ero1alpha regulatory disulphides ensures tight control of substrate oxidation. *EMBO J.* **27**, 2988–2997
- Molteni, S. N., Fassio, A., Ciriolo, M. R., Filomeni, G., Pasqualetto, E., Fagioli, C. and Sitia, R. (2004) Glutathione limits Ero1-dependent oxidation in the endoplasmic reticulum. *J. Biol. Chem.* **279**, 32667–32673
- Jessop, C. E. and Bulleid, N. J. (2004) Glutathione directly reduces an oxidoreductase in the endoplasmic reticulum of mammalian cells. *J. Biol. Chem.* **279**, 55341–55347
- Appenzeller-Herzog, C. (2011) Glutathione- and non-glutathione-based oxidant control in the endoplasmic reticulum. *J. Cell Sci.* **124**, 847–855
- Kim, S., Sideris, D. P., Sevier, C. S. and Kaiser, C. A. (2012) Balanced Ero1 activation and inactivation establishes ER redox homeostasis. *J. Cell Biol.* **196**, 713–725
- Sevier, C. S., Qu, H., Heldman, N., Gross, E., Fass, D. and Kaiser, C. A. (2007) Modulation of cellular disulfide-bond formation and the ER redox environment by feedback regulation of Ero1. *Cell* **129**, 333–344
- Heldman, N., Vonshak, O., Sevier, C. S., Vitu, E., Mehlman, T. and Fass, D. (2010) Steps in reductive activation of the disulfide-generating enzyme Ero1p. *Protein Sci.* **19**, 1863–1876
- Birk, J., Meyer, M., Aller, I., Hansen, H. G., Odermatt, A., Dick, T. P., Meyer, A. J. and Appenzeller-Herzog, C. (2013) Endoplasmic reticulum: reduced and oxidized glutathione revisited. *J. Cell Sci.*, doi: 10.1242/jcs.117218



- 33 Dias-Gunasekara, S., Gubbens, J., van Lith, M., Dunne, C., Williams, J. A., Katakly, R., Scoones, D., Laphorn, A., Bulleid, N. J. and Benham, A. M. (2005) Tissue-specific expression and dimerization of the endoplasmic reticulum oxidoreductase Ero1 $\beta$ . *J. Biol. Chem.* **280**, 33066–33075
- 34 Dias-Gunasekara, S., van Lith, M., Williams, J. A., Katakly, R. and Benham, A. M. (2006) Mutations in the FAD binding domain cause stress-induced misoxidation of the endoplasmic reticulum oxidoreductase Ero1 $\beta$ . *J. Biol. Chem.* **281**, 25018–25025
- 35 Appenzeller-Herzog, C. and Ellgaard, L. (2008) *In vivo* reduction-oxidation state of protein disulfide isomerase: the two active sites independently occur in the reduced and oxidized forms. *Antioxid. Redox Signal.* **10**, 55–64
- 36 Arnold, K., Bordoli, L., Kopp, J. and Schwede, T. (2006) The SWISS-MODEL workspace: a web-based environment for protein structure homology modelling. *Bioinformatics* **22**, 195–201
- 37 Masui, S., Vavassori, S., Fagioli, C., Sitia, R. and Inaba, K. (2011) Molecular bases of cyclic and specific disulfide interchange between human ERO1 $\alpha$  protein and protein-disulfide isomerase (PDI). *J. Biol. Chem.* **286**, 16261–16271
- 38 Ahmad, S., Gromiha, M., Fawareh, H. and Sarai, A. (2004) ASAView: database and tool for solvent accessibility representation in proteins. *BMC Bioinformatics* **5**, 51
- 39 Fraczekiewicz, R. and Braun, W. (1998) Exact and efficient analytical calculation of the accessible surface areas and their gradients for macromolecules. *J. Comput. Chem.* **19**, 319–333
- 40 Hansen, R. E. and Winther, J. R. (2009) An introduction to methods for analyzing thiols and disulfides: Reactions, reagents, and practical considerations. *Anal. Biochem.* **394**, 147–158
- 41 Lind, C., Gerdes, R., Hamnell, Y., Schuppe-Koistinen, I., von Lowenhilml, H. B., Holmgren, A. and Cotgreave, I. A. (2002) Identification of S-glutathionylated cellular proteins during oxidative stress and constitutive metabolism by affinity purification and proteomic analysis. *Arch. Biochem. Biophys.* **406**, 229–240
- 42 Otsu, M., Bertoli, G., Fagioli, C., Guerini-Rocco, E., Nerini-Molteni, S., Ruffato, E. and Sitia, R. (2006) Dynamic retention of Ero1 $\alpha$  and Ero1 $\beta$  in the endoplasmic reticulum by interactions with PDI and ERp44. *Antioxid. Redox Signal.* **8**, 274–282
- 43 Sato, Y., Kojima, R., Okumura, M., Hagiwara, M., Masui, S., Maegawa, K., Saiki, M., Horibe, T., Suzuki, M. and Inaba, K. (2013) Synergistic cooperation of PDI family members in peroxiredoxin 4-driven oxidative protein folding. *Sci. Rep.* **3**, 2456
- 44 Yamamoto, K., Sato, T., Matsui, T., Sato, M., Okada, T., Yoshida, H., Harada, A. and Mori, K. (2007) Transcriptional induction of mammalian ER quality control proteins is mediated by single or combined action of ATF6 $\alpha$  and XBP1. *Dev. Cell* **13**, 365–376
- 45 Zito, E., Chin, K. T., Blais, J., Harding, H. P. and Ron, D. (2010) ERO1 $\beta$ , a pancreas-specific disulfide oxidase, promotes insulin biogenesis and glucose homeostasis. *J. Cell Biol.* **188**, 821–832
- 46 Wright, J., Birk, J., Haataja, L., Liu, M., Ramming, T., Weiss, M. A., Appenzeller-Herzog, C. and Arvan, P. (2013) Endoplasmic reticulum oxidoreductin-1 $\alpha$  (ero1 $\alpha$ ) improves folding and secretion of mutant proinsulin and limits mutant proinsulin-induced ER stress. *J. Biol. Chem.* **288**, 31010–31018
- 47 Araki, K. and Nagata, K. (2011) Functional *in vitro* analysis of the ERO1 protein and protein-disulfide isomerase pathway. *J. Biol. Chem.* **286**, 32705–32712

---

Received 19 November 2013/8 January 2014; accepted 28 January 2014

Published as Immediate Publication 25 February 2014, doi 10.1042/BSR20130124

---

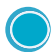

OPEN ACCESS

## SUPPLEMENTARY DATA

# Biochemical evidence that regulation of Ero1 $\beta$ activity in human cells does not involve the isoform-specific cysteine 262

Henning G. HANSEN\*<sup>1</sup>, Cecilie L. SØLTOFT\*, Jonas D. SCHMIDT\*<sup>2</sup>, Julia BIRK†, Christian APPENZELLER-HERZOG\*† and Lars ELLGAARD\*<sup>3</sup>

\*Department of Biology, University of Copenhagen, 2200 Copenhagen, Denmark

†Department of Pharmaceutical Sciences, University of Basel, 4056 Basel, Switzerland

Supplementary Figure S1 is on the following page.

<sup>1</sup> Present address: Novo Nordisk Foundation Center for Biosustainability, Technical University of Denmark, 2970 Hørsholm, Denmark.

<sup>2</sup> Present address: Department of International Health, Immunology and Microbiology, University of Copenhagen, 2200 Copenhagen, Denmark.

<sup>3</sup> To whom correspondence should be addressed (email: [lellgaard@bio.ku.dk](mailto:lellgaard@bio.ku.dk)).

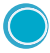

42 44

Xt 1 -----MEVNRVVPVLVMMIISLSPSTEDT--ETTEREAKKESRAVSEQSCGCHITGVLDDCFCDDVPSIDAFNNFKIFF  
 Ac 1 -----ITGVLDDCCLCDIHSIDEFNNFKIFF  
 Md 1 MSRAGRRS--RAGAAAQVQLVWVTLCLTTAA-----EAQITGVLDDCCLCDIHSIDSFNTYKIFF  
 Mm 1 MSPGFRAVAVTGGAAAQVQLVWVTLCLTAA-----KTOVITGVLDDCCLCDIHSIDSFNTYKIFF  
 Cf 1 MRPGARPAGAGQGAAAAAQLLTLTSLFSPV-----EAQITGVLDDCCLCDIHSIDSFNTYKIFF  
**Hs 1 MSQVRRAGAGQVAAAQVQLVWVTLCLTAA-----EAQITGVLDDCCLCDIHSIDSFNTYKIFF**  
 Dr 1 MLHRTQTHGLVILMSLICGYFCSGWFOQNAKSKSTQKEPVYGHTEDELQSCCLCHITGVLDDCFCDDIHSIDVFNNEKIVP  
 Ol 1 -----VRLAMSTANVC-VWVQRILT-----LSWKLPCLLQITGVLDDCFCDDVPSIDVFNNEKIVP  
 Tr 1 -----RYCETFILSRGI-----DGSDIVSSAQLTGLDDCFCDDVPSIDVFNNEKIVP

81 90 95 100 130

Xt 73 KIKKLOERDYFRYYKVNLRKCPFWAEDGHCSIKDCHVEPCPEKVPVGIKAGSNYK--YSLEA--NSEKIDACEQANKL  
 Ac 26 KIKKLOERDYFRYYKVNLRKCPFWAEDGHCSIKDCHVEPCPEKVPVGIKAGSNK--YSKIA--NHTKELEDCEQANKL  
 Md 58 KIKKLOERDYFRYYKVNLRKCPFWAEDGHCSIKDCHVEPCPEKVPVGIKAGSNK--YSKAA--NNTKELEDCEQANKL  
 Mm 60 KIKKLOERDYFRYYKVNLRKCPFWAEDGHCSIKDCHVEPCPEKVPVGIKAGSNK--YSQAA--NSTKELEDCEQANKL  
 Cf 60 KIKKLOERDYFRYYKVNLRKCPFWAEDGHCSIKDCHVEPCPEKVPVGIKAGSNK--YSKVA--NNTKELEDCEQANKL  
**Hs 60 KIKKLOERDYFRYYKVNLRKCPFWAEDGHCSIKDCHVEPCPEKVPVGIKAGSNK--YLKMA--NNTKELEDCEQANKL**  
 Dr 81 HIRKLTERRDYFRYYKVNLRKCPFWPDDGSHCSIKDCHVEPCPEKVPVGIKAGSNYK--YSHAA--NTVSEMERCEQAHEL  
 Ol 55 QIKKLTERRDYFRYYKVNLRKCPFWPDDGSHCSIKDCHVEPCPEKVPVGIKAGSNYK--YSHAA--NTVSEMERCEQAHEL  
 Tr 48 RIKKLTERRDYFRYYKVNLRKCPFWPDDGSHCSIKDCHVEPCPEKVPVGIKAGSNYK--YSQVA--NLMADTECEQANKL

165 207

Xt 150 GAIN--STLSNQSKEAFIDWARYDDAQDHFCELDDBRSPDQVVDLLNPERYTYGKGSARVWVNSIYEENCFKPRSVY  
 Ac 103 GAIN--STLSNQSKEAFIDWARYDDAQDHFCELDDBRSPDQVVDLLNPERYTYGKGSARVWVNSIYEENCFKPRSVY  
 Md 135 GAIN--STLSNQSKEAFIDWARYDDAQDHFCELDDBRSPAVQVVDLLNPERYTYGKGSARVWVNSIYEENCFKPRSVY  
 Mm 137 GAIN--STLSNQSKEAFIDWARYDDAQDHFCELDDBRSPAAQVVDLLNPERYTYGKGSARVWVNSIYEENCFKPRSVY  
 Cf 137 GAIN--STLSNQSKEAFIDWARYDDAQDHFCELDDBRSPAAQVVDLLNPERYTYGKGSARVWVNSIYEENCFKPRSVY  
**Hs 137 GAIN--STLSNQSKEAFIDWARYDDAQDHFCELDDBRSPAAQVVDLLNPERYTYGKGSARVWVNSIYEENCFKPRSVY**  
 Dr 158 GAIN--STLSNQSKEAFADWARRHDDAQDHFCELDDBRSPDQVVDLLNPERYTYGKGSARVWVNSIYEENCFKPRSVY  
 Ol 135 NSINYFCYSNQSKEAFADWARRHDDAQDHFCELDDBRSPDQVVDLLNPERYTYGKGSARVWVNSIYEENCFKPRSVY  
 Tr 125 GAIN--STLSNQSKEAFADWARRHDDAQDHFCELDDBRSPAAQVVDLLNPERYTYGKGSARVWVNSIYEENCFKPRSVY

240 262

Xt 228 RPLNPLAPSRGDDGGSFYTWLEGLCLEKRVFYRLISGLHSSINHLCAKYLLEETWGWKPSWGNPKIEFRFRFDVETK  
 Ac 181 RPLNPLAPSRGDDGGSFYTWLEGLCLEKRVFYRLISGLHSSINHLCAKYLLEETWGWKPSWGNPKIEFRFRFDVETK  
 Md 213 RPLNPLAPSRGDDGGSFYTWLEGLCLEKRVFYRLISGLHSSINHLCAKYLLEETWGWKPSWGNPKIEFRFRFDVETK  
 Mm 215 RPLNPLAPSRGDDGGSFYTWLEGLCLEKRVFYRLISGLHSSINHLCAKYLLEETWGWKPSWGNPKIEFRFRFDVETK  
 Cf 215 RPLNPLAPSRGDDGGSFYTWLEGLCLEKRVFYRLISGLHSSINHLCAKYLLEETWGWKPSWGNPKIEFRFRFDVETK  
**Hs 215 RPLNPLAPSRGDDGGSFYTWLEGLCLEKRVFYRLISGLHSSINHLCAKYLLEETWGWKPSWGNPKIEFRFRFDVETK**  
 Dr 236 RPLNPLAPSRGDDGGSFYTWLEGLCLEKRVFYRLISGLHSSINHLCAKYLLEETWGWKPSWGNPKIEFRFRFDVETK  
 Ol 215 RPLNPLAPSRGDDGGSFYTWLEGLCLEKRVFYRLISGLHSSINHLCAKYLLEETWGWKPSWGNPKIEFRFRFDVETK  
 Tr 203 RPLNPLAPSRGDDGGSFYTWLEGLCLEKRVFYRLISGLHSSINHLCAKYLLEETWGWKPSWGNPKIEFRFRFDVETK

Xt 308 EGPRLKLNLYFLYLIELRALSKVAPYFERSIVDLYTGNVEEDADTKLLLNIFQDTKSPMHFDEKSMFAGKKGAKSLK  
 Ac 261 EGPRLKLNLYFLYLIELRALSKVAPYFERSIVDLYTGNVEEDTETKSLLEIFRDTKSPMHFDEKSMFAGKKGAKSLK  
 Md 293 EGPRLKLNLYFLYLIELRALSKVAPYFERSIVDLYTGNVEEDAKTKALLLEIFQDTKSPMHFDEKSMFAGKKGAKSLK  
 Mm 295 EGPRLKLNLYFLYLIELRALSKVAPYFERSIVDLYTGNVEEDADTKLLLNIFQDTKSPMHFDEKSMFAGKKGAKSLK  
 Cf 295 EGPRLKLNLYFLYLIELRALSKVAPYFERSIVDLYTGNVEEDADTKLLLNIFQDTKSPMHFDEKSMFAGKKGAKSLK  
**Hs 295 EGPRLKLNLYFLYLIELRALSKVAPYFERSIVDLYTGNVEEDADTKLLLNIFQDTKSPMHFDEKSMFAGKKGAKSLK**  
 Dr 316 EGPRLKLNLYFLYLIELRALSKVAPYFERSIVDLYTGNVEEDTSTKQLLEIFRDTKSPMHFDEKSMFAGKKGAKSLK  
 Ol 295 EGPRLKLNLYFLYLIELRALSKVAPYFERSIVDLYTGNVEEDGDTKLLLNIFNKTSPMHFDEKSMFAGKKGAKSLK  
 Tr 283 EGPRLKLNLYFLYLIELRALSKVAPYFERSIVDLYTGNVEEDRATKLLLEIFRDTKSPMHFDEKSMFAGKKGAKSLK

390 393 396

Xt 388 EEFRLHFKNISRIMDCVGCCKRLWGKLTQGLGTALKILFSEKEIQKLPENSPSKGFQLTRQEIIVALLNAGFRLSTSIK  
 Ac 341 EEFRLHFKNISRIMDCVGCCKRLWGKLTQGLGTALKILFSEKEIQKLPENSPSKGFQLTRQEIIVALLNAGFRLSTSIK  
 Md 373 EEFRLHFKNISRIMDCVGCCKRLWGKLTQGLGTALKILFSEKEIQKLPENSPSKGFQLTRQEIIVALLNAGFRLSTSIK  
 Mm 375 EEFRLHFKNISRIMDCVGCCKRLWGKLTQGLGTALKILFSEKEIQKLPENSPSKGFQLTRQEIIVALLNAGFRLSTSIK  
 Cf 375 EEFRLHFKNISRIMDCVGCCKRLWGKLTQGLGTALKILFSEKEIQKLPENSPSKGFQLTRQEIIVALLNAGFRLSTSIK  
**Hs 375 EEFRLHFKNISRIMDCVGCCKRLWGKLTQGLGTALKILFSEKEIQKLPENSPSKGFQLTRQEIIVALLNAGFRLSTSIK**  
 Dr 396 EEFRLHFKNISRIMDCVGCCKRLWGKLTQGLGTALKILFSEKEIQKLPENSPSKGFQLTRQEIIVALLNAGFRLSTSIK  
 Ol 375 EEFRLHFKNISRIMDCVGCCKRLWGKLTQGLGTALKILFSEKEIQKLPENSPSKGFQLTRQEIIVALLNAGFRLSTSIK  
 Tr 363 EEFRLHFKNISRIMDCVGCCKRLWGKLTQGLGTALKILFSEKEIQKLPENSPSKGFQLTRQEIIVALLNAGFRLSTSIK

Xt 468 ELQSFYKLLDHR  
 Ac 421 ELQNFKILLQTS  
 Md 453 ELQNFKILLKNSR  
 Mm 455 ELQNFKALLQHR  
 Cf 455 ELQNFKILLQHSR  
**Hs 455 ELQNFKILLQHSR**  
 Dr 476 ELHNFRTLLKDR  
 Ol 455 QLHNFRLMLKERG  
 Tr 443 QLHNFRLLEER

Downloaded from http://portlandpress.com/biochem/article-pdf/34/2/e00103/475331/bio034e103.pdf by guest on 24 April 2024

**Figure S1 Evolutionary conservation of Ero1 $\beta$** 

A multiple sequence alignment of Ero1 $\beta$  orthologs was performed with Muscle [1] using the following UniProt entries. *Xenopus tropicalis* (frog; F6ULN4); *Gallus gallus* (chicken; E1C917); *Anolis carolinensis* (lizard; G1KAL4); *Monodelphis domestica* (opossum; F7CL82); *Mus musculus* (mouse; Q8R2E9); *Canis familiaris* (dog; F1Q091); *Homo sapiens* (human; Q86YB8); *Danio rerio* (zebrafish; E7F2A8); *Oryzias latipes* (rice fish; H2L719); *Takifugu rubripes* (pufferfish; H2TT03). Black boxes indicate amino acid identities and grey boxes show amino acid similarities when found in at least seven of the nine sequences. The human sequence is shown in boldface, cysteine residues are shown in red colour and amino acid position of the cysteine residues in the human sequence is indicated above the alignment.

---

**REFERENCE**

- 1 Edgar, R. C. (2004) MUSCLE: multiple sequence alignment with high accuracy and high throughput. *Nucleic Acids Res.* **32**, 1792–1797

---

Received 19 November 2013/8 January 2014; accepted 28 January 2014

---

Published as Immediate Publication 25 February 2014, doi 10.1042/BSR20130124

---
